1 **A nonlinear simulation framework supports adjusting for age when**  
2 **analyzing BrainAGE. Trang T. Le<sup>1,2†</sup>, Rayus Kuplicki<sup>1\*†</sup>, Brett A. McKinney<sup>2,3</sup>,**  
3 **Hung-wen Yeh<sup>1</sup>, Wesley K. Thompson<sup>4</sup>, Tulsa 1000 Investigators, Martin P. Paulus<sup>1</sup>**

4 <sup>1</sup>Laureate Institute for Brain Research, Tulsa, OK, USA

5 <sup>2</sup>Department of Mathematics, University of Tulsa, Tulsa, OK, USA

6 <sup>3</sup>Tandy School of Computer Science, University of Tulsa, Tulsa, OK, USA

7 <sup>4</sup>Department of Psychiatry, University of California, San Diego, La Jolla, CA, USA

8 <sup>5</sup>Oxley College of Health Sciences, University of Tulsa, Tulsa, Oklahoma.

9 <sup>6</sup>Stephenson School of Biomedical Engineering, University of Oklahoma, Norman, OK, USA

10 **\* Correspondence:**

11 Rayus Kuplicki

12 [rkuplicki@laureateinstitute.org](mailto:rkuplicki@laureateinstitute.org)

13 **† These authors contributed equally to this work**

14 **Keywords: BrainAGE, simulation, false positives, SVR, MRI, aging**

15 **Abstract**

16 Several imaging modalities, including T1-weighted structural imaging, diffusion tensor imaging, and  
17 functional MRI can show chronological age related changes. Employing machine learning  
18 algorithms, an individual's imaging data can predict their age with reasonable accuracy. While details  
19 vary according to modality, the general strategy is to: 1) extract image-related features, 2) build a  
20 model on a training set that uses those features to predict an individual's age, 3) validate the model  
21 on a test dataset, producing a predicted age for each individual, 4) define the "Brain Age Gap  
22 Estimate" (BrainAGE) as the difference between an individual's predicted age and his/her  
23 chronological age, and 5) estimate the relationship between BrainAGE and other variables of interest,  
24 and 6) make inferences about those variables and accelerated or delayed brain aging. For example, a  
25 group of individuals with overall positive BrainAGE may show signs of accelerated aging in other  
26 variables as well. There is inevitably an overestimation of the age of younger individuals and an  
27 underestimation of the age of older individuals due to 'regression to the mean'. The correlation  
28 between chronological age and BrainAGE may significantly impact the relationship between  
29 BrainAGE and other variables of interest when they are also related to age. In this study, we examine  
30 the detectability of variable effects under different assumptions. We use empirical results from two  
31 separate datasets [training=475 healthy volunteers, aged 18 – 60 years (259 female); testing=489  
32 participants including people with mood/anxiety, substance use, eating disorders and healthy  
33 controls, aged 18 – 56 years (312 female)] to inform simulation parameter selection. Outcomes in  
34 simulated and empirical data strongly support the proposal that models incorporating BrainAGE  
35 should include chronological age as a covariate. We propose either including age as a covariate in  
36 step 5 of the above framework, or employing a multistep procedure where age is regressed on  
37 BrainAGE prior to step 5, producing BrainAGE Residualized (BrainAGER) scores.

38

## 39 1 Introduction

40 Aging is a biological process that can affect behavioral and cognitive dimensions. Biological age as  
41 measured by telomere length deviates from an individual's chronological age as a result of  
42 environment, lifestyle, and genetics (Shammas, 2011). However, other measures of biological age  
43 that may be particularly relevant to psychopathology can involve structural and functional changes in  
44 the brain.

45 Several imaging modalities, including T1-weighted structural imaging (Franke et al., 2010), diffusion  
46 tensor imaging (Han et al., 2014; Lin et al., 2016), and functional MRI (Tian et al., 2016) have been  
47 used in conjunction with machine learning algorithms to predict an individual's age. Recently,  
48 integration of neuroimaging data of different feature types and across multiple modalities has been  
49 shown to improve age prediction (Erus et al., 2015; Gutierrez Becker et al., 2018; Liem et al., 2017).  
50 While the details vary according to modality, the general strategy has been to 1) extract image-related  
51 features, 2) build a model on a training set composed of healthy participants using these features to  
52 predict participant age, 3) apply that model to a testing set, producing a predicted age for each  
53 individual, 4) compute the difference between a participant's predicted age and chronological age  
54 (often referred to as Brain Age Gap Estimate, BrainAGE, or brain predicted age difference, brain-  
55 PAD), 5) test for relationships between other variables of interest and BrainAGE, and 6) make  
56 inferences about accelerated or delayed brain aging (Cole and Franke, 2017). Variables of interest  
57 have included physical fitness (Ritchie et al., 2017), physical activity (Steffener et al., 2016),  
58 cognitive impairment after traumatic brain injury (Cole et al., 2015), mortality risk in elderly  
59 participants (Cole et al., 2018), acute ibuprofen administration in healthy participants (Le et al., 2018)  
60 or status of various diseases and disorders such as diabetes (Franke et al., 2013), Alzheimer's disease  
61 (Gaser et al., 2013; Löwe et al., 2016), psychiatric disorders (Koutsouleris et al., 2014; Nenadić et al.,  
62 2017) and human immunodeficiency virus (Wilkins, 2017).

63 Support Vector Regression (SVR) with a radial kernel is a commonly used machine learning  
64 algorithm to predict age and compute BrainAGE (Franke et al., 2010), along with other methods such  
65 as Gaussian process and relevant vector regression (Drucker et al., 1997). The residual error of these  
66 age-predicting models, BrainAGE, is necessarily correlated with age, which results in an  
67 overestimation of the age of younger individuals and an underestimation of the age of older  
68 individuals. This is due to the fact that these algorithms, like all regression methods, are subject to the  
69 fundamental phenomenon of "regression towards the mean" (Galton, 1886). A theoretical basis for  
70 this phenomenon is presented in section 2.1. In practice, the correlation between chronological age  
71 and BrainAGE is visually evident in many figures of chronological versus predicted age (Cole et al.,  
72 2018; Franke et al., 2010). While most studies involving BrainAGE have not discussed the age-  
73 BrainAGE correlation, some have accounted for this correlation by using predicted age as the  
74 primary outcome, which is similar to the correction we propose (Erus et al., 2015; Habes et al.,  
75 2016).

76 The age-BrainAGE correlation may affect the apparent relationship between BrainAGE and variables  
77 of interest when these other variables are also related to age. In the clinical neuroscience domain, for  
78 example, we may be interested in covariates including physiological variables such as body  
79 composition or psychological measures of mood or testing performance, some of which have clear  
80 relationships with age. In this study, we examine the detectability of multiple covariate effects in  
81 both real and simulated data. Using real data, we characterized relationships between BrainAGE, age,  
82 and other variables of interest. Then, we generated a known "ground truth" with characteristics  
83 similar to what we observed in real data. In our simulation model, age has a direct effect on the  
84 variables of interest, which may in turn affect simulated imaging features. We include both linear and  
85 nonlinear effects at each level.

86 The goals of the current study are: 1) to highlight the universal correlation between chronological age  
87 and BrainAGE in theory and practice and 2) develop a general framework for simulating age-  
88 dependent data that can be used to investigate the effect of the age-BrainAGE correlation in  
89 subsequent analyses. One of the challenges of determining the best practices for using BrainAGE in  
90 statistical modeling is related to the fact that variables of interest may be related to age, but not  
91 directly related to accelerated or delayed brain aging. In that case, spurious relationships with  
92 BrainAGE may be observed. Our results strongly support the proposal that models including  
93 BrainAGE as an independent variable should be adjusted for chronological age as well.

## 94 **2 Methods**

95 We begin with a theoretical explanation for regression toward the mean and the concurrent  
96 correlation between the residuals and observed values for any regression. Then, we show in our own  
97 data the relationships between chronological age, BrainAGE, and other covariates of interest as a  
98 basis for the parameters in our simulations. Finally, we describe a simulation approach to generate  
99 data with a comparable age effect on brain image features and show how the age-BrainAGE  
100 correlation can contribute to observed relationships, even when the simulated independent variables  
101 do not associate with imaging features. The R scripts for simulation and analysis are publicly  
102 available on the GitHub repository <https://github.com/lelaboratoire/BrainAGE-simulation>.

### 103 **2.1 Theoretical Basis for the age-BrainAGE Correlation**

#### 104 **2.1.1 Regression Toward the Mean**

105 Consider  $n$  data points  $(y_i, x_i), i = 1, \dots, n$  used to fit a simple linear regression  $y = \alpha + \beta x + \varepsilon$ .  
106 Least-square estimation leads to

$$107 \quad \hat{\beta} = r_{xy} \frac{s_y}{s_x}, \quad \hat{\alpha} = \bar{y} - \hat{\beta} \bar{x},$$

108 where  $r_{xy}$  is the Pearson correlation between  $x$  and  $y$ ,  $s_x$  and  $s_y$  are the standard deviation,  
109 respectively. Substituting the formulas into the fitted values  $\hat{y} = \hat{\alpha} + \hat{\beta}x$  yields

$$110 \quad \frac{\hat{y} - \bar{y}}{s_y} = r_{xy} \left( \frac{x - \bar{x}}{s_x} \right).$$

111 In this setting, regression toward the mean refers to the phenomenon that the standardized predicted  
112 value of  $y$  is closer to its mean than that of  $x$  to its mean for any imperfect correlation,  $-1 < r_{xy} < 1$ .  
113 The weaker the correlation, the greater the extent of regression toward the mean. For perfect  
114 correlations ( $|r_{xy}| = 1$ ), the standardized distance between the predicted value in  $y$  to its mean equals  
115 that of  $x$  to its mean and there is no regression toward the mean. The implication for BrainAGE is  
116 that the age of younger individuals tends to be overestimated and the age of older individuals tends to  
117 be underestimated.

#### 118 **2.1.2 Partition of Variance or Analysis of Variance (ANOVA)**

119 In the general setting  $y = f(X) + \varepsilon$ , where  $X$  can be any dimension and  $f(\cdot)$  can be any regression  
120 model, the variance of  $y$  is partitioned into a part that can be explained by  $X$ , and a part due to  
121 random error:  $\sigma_y^2 = \sigma_X^2 + \sigma_\varepsilon^2$ . Then

$$122 \quad \text{Cov}(y, f(X)) = \sigma_X^2, \quad \text{Cov}(y, \varepsilon) = \sigma_\varepsilon^2$$

123 
$$\text{Corr}(y, f(X)) = \frac{\sigma_X^2}{\sqrt{\sigma_X^2 + \sigma_\varepsilon^2} \sqrt{\sigma_X^2}} = \frac{\sigma_X}{\sqrt{\sigma_X^2 + \sigma_\varepsilon^2}}, \quad \text{Corr}(y, \varepsilon) = \frac{\sigma_\varepsilon}{\sqrt{\sigma_X^2 + \sigma_\varepsilon^2}}$$

124 For  $\hat{y} = \hat{f}(X)$ ,  $y = \hat{f}(X) + \hat{\varepsilon}$  and

125 
$$\text{Corr}(y, \hat{f}(X)) = \frac{\hat{\sigma}_X}{\sqrt{\hat{\sigma}_X^2 + \hat{\sigma}_\varepsilon^2}}, \quad \text{Corr}(y, \hat{\varepsilon}) = \frac{\hat{\sigma}_\varepsilon}{\sqrt{\hat{\sigma}_X^2 + \hat{\sigma}_\varepsilon^2}}$$

126 where  $\hat{\sigma}_X^2 = \text{Var}(\hat{f}(X)) = \text{Var}(\hat{y})$  and  $\hat{\sigma}_\varepsilon^2 = \text{Var}(\hat{\varepsilon})$ .

127 Thus,  $\text{Corr}(y, \hat{\varepsilon}) > 0$  unless  $\hat{f}(X)$  predicts  $y$  perfectly with  $\hat{\sigma}_\varepsilon = 0$ . The correlation formulas suggest  
128 that the correlation between residual and  $y$  decreases with the correlation between  $y$  and  $\hat{y}$ , i.e.  
129 prediction accuracy of  $\hat{f}(X)$ . Figure S1 illustrates this phenomenon using a simple simulation where  
130  $y$  was a function of  $x$  plus random normal noise. As the noise decreases (and fit increases), the  
131 correlation between  $y$  and the residuals decreases as well.

132 In the context of BrainAGE, the goal is to find  $\hat{f}(\cdot)$  that best predicts chronological age ( $y$ ) using  
133 brain measures as  $X$ , and BrainAGE is computed as  $-\hat{\varepsilon} = \hat{y} - y$ . Because  $\hat{f}(X)$  never predicts  
134 chronological age perfectly, BrainAGE remains correlated with age. When BrainAGE is used as the  
135 response variable in subsequent analyses to make inferences on a covariate  $Z$ , it is important to check  
136 whether  $Z$  is associated with chronological age. If  $Z$  is not associated with chronological age, then  
137 one may simply evaluate the bivariate association between BrainAGE and  $Z$ . On the other hand, if  $Z$   
138 is associated with both chronological age and BrainAGE, chronological age may confound the  
139 relationship between BrainAGE and  $Z$  (Elwood, 1992) and should be taken into account.  
140 Confounding effects can be addressed at study design (e.g., randomization and matching) or in  
141 statistical analysis (e.g., stratification of the confounder or including the confounder as a covariate  
142 (Pourhoseingholi et al., 2012). For example, Franke et al. (2010) considered a variable  $Z$  that  
143 represents two groups (ill versus healthy) and selected two groups of individuals with similar  
144 chronological age (so  $Z$  is not associated with chronological age) to compare their BrainAGE. In the  
145 current work, we include chronological age as a covariate and evaluate this approach in the context of  
146 BrainAGE.

## 147 2.2 Empirical Data

148 We used two separate datasets to illustrate the correlation between BrainAGE and chronological age  
149 and the effect this can have on associations with covariates of interest. All data were collected at the  
150 Laureate Institute for Brain Research between 2009 and 2017. All protocols were approved by  
151 Western Institutional Review Board ([www.wirb.com](http://www.wirb.com)). Participants signed written informed consent  
152 and received financial compensation for their participation.

### 154 2.2.1 Training Dataset

155 Structural MRI data were collected from 475 healthy volunteers (mean age  $\pm$  sd = 30.5  $\pm$  10.3 years;  
156 age range = 18 – 60 years; 259 female) between 2009 and 2017. Each participant was scanned in a  
157 3T GE MR750 whole body scanner. Scans were acquired using axial T1-weighted MP-RAGE  
158 sequences with a 24cm FOV, 256x256 acquisition matrix, 8-degree flip angle and .9375x.9375mm  
159 in-plane resolution with no gap. Other parameters varied within the following ranges: 5.736 to  
160 6.292ms TR, 1.896 to 2.104ms TE, 0.9 to 1.2mm slice thickness, with either an 8- (General Electric,  
161 Milwaukee, WI) or 32- (Nova Medical Inc., Wilmington MA) channel phased array coil. Healthy  
162 neuropsychiatric status was assessed using either the MINI-international Neuropsychiatric Interview

163 (Sheehan et al., 1998) or the Structured Clinical Interview for DSM-IV (First et al., 2002) (First,  
164 Michael B., Spitzer, Robert L, Gibbon Miriam, and Williams, Janet B.W., 2002).

165

## 166 **2.2.2 Testing Dataset**

167 Structural MRI data were collected from 489 (mean age  $\pm$  sd =  $34.6 \pm 10.6$  years; age range = 18 –  
168 56 years; 312 female) participants as part of Tulsa 1000, a longitudinal observational study including  
169 people with mood/anxiety, substance use, eating disorders and healthy controls. Inclusion criteria for  
170 the participant populations were Patient Health Questionnaire  $\geq 10$ , Overall Anxiety Severity and  
171 Impairment Scale  $\geq 8$ , Drug Abuse Screening Test  $> 3$ , or SCOFF  $\geq 2$ . Exclusion criteria included a  
172 history of significant brain trauma, neurological disorders, change in medication within six week  
173 prior to scanning, bipolar disorder, and schizophrenia. Scanning parameters for this dataset were:  
174 24cm FOV, 256x256 acquisition matrix, 186 axial slices, 0.9mm slice thickness with no gap,  
175 TR/TE=5/2.012ms, using an 8-channel phased array coil (General Electric, Milwaukee, WI). Testing  
176 and training sets differed on mean age ( $t = 6.2$ ,  $p < 0.0001$ , mean difference 4.2 years) and sex  
177 composition ( $\chi^2 = 8.2$ ,  $p = 0.004$ ).

178 All participants in the testing dataset also underwent an intense battery of assessments including self-  
179 report, clinical interviews, neuropsychological testing, and body composition analysis. For full  
180 details, please see (Victor et al., 2018). From these, we selected 154 measures, which were used to  
181 illustrate the normal range of correlations with age and how these can affect the relationship between  
182 BrainAGE and covariates of interest.

183

## 184 **2.2.3 Image Processing**

185 All images in both the testing and training sets were processed using Freesurfer version 6.0.0 (Dale et  
186 al., 1999) in order to produce grey/non-grey matter masks. Then, using a procedure similar to Franke  
187 (Franke et al., 2010) but implemented in AFNI, all grey matter masks were transformed to MNI  
188 space via affine transformation, smoothed with an 8mm gaussian kernel, and downsampled to  
189 8x8x8mm voxels. This produced a set of 3707 voxels per participant, with the value at each voxel  
190 representing the fraction of that voxel comprised of grey matter.

191 R (version 3.2.2) and R package caret (version 6.0.76) were used to fit a support vector regression  
192 (SVR) model with radial basis functions. The  $\epsilon$  (tolerance margin) was fixed at and cost parameters  
193 were tuned using 5 repeats of 10-fold cross validation in the training set. The hyperparameter space  
194 was sampled using a grid search that fixed  $\epsilon$  at 0.000145 and allowed cost to vary from 0.25 to 4096.  
195 The final best model (cost = 2) was then applied to the testing set to produce one predicted age for  
196 each participant. BrainAGE was taken to be predicted age minus chronological age.

197 Additionally, we define the Brain Age Gap Estimate Residualized (BrainAGER) to be the residual of  
198 the regression of BrainAGE on age to remove the remaining linear bias of age. This way, we have a  
199 measure of deviation from expected age that is linearly uncorrelated with chronological age.

## 200 **2.3 Simulation**

201 To investigate the effect of the age-BrainAGE correlation on subsequent modeling results, we  
202 simulated hierarchical correlation structures among brain features, chronological age and covariates  
203 using a generative biological model (Fig. 1). We then generated two groups of independent variables.  
204 Within each group of variables, some are dependent on age and others are not. One group was used  
205 in the simulation of neuroimaging features, while the other was not. We randomly split the data set  
206 into two subsets, trained SVR on the training set and computed BrainAGE on the testing set. On the  
207 testing set, we conducted linear regressions of BrainAGE on all independent variables, both with and



208 without chronological age. With 1,000 replications, we assessed the significance of the contribution  
 209 from the independent variables by examining the distribution of the resulting  $p$ -values.

210 **2.3.1 Model Definition**

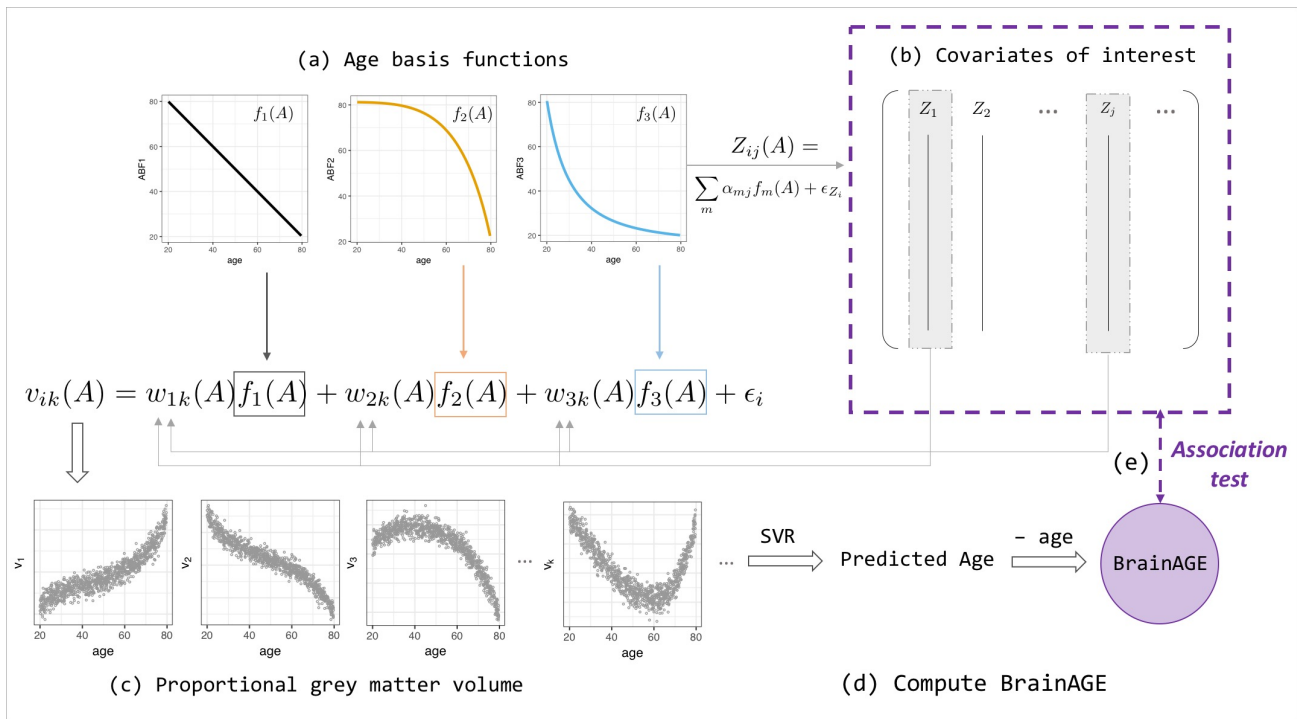

211 Figure 1. BrainAGE simulation and analysis framework (Eqs. 2-4). (a) Linear and non-linear age  
 212 basis functions (ABFs)  $f_i$  (orange, black and blue lines). For a particular individual  $i$ , the ABFs are  
 213 combined to create volume  $k$ 's grey matter proportion  $v_{ik}$  (orange, black and blue arrows) and age-  
 214 dependent covariates of interest,  $Z_{ij}(A)$  with a different set of coefficients  $\alpha_j$ . (b) Some of the  $Z_{ij}$  are  
 215 then fed back into the  $w_{ik}$  when generating volume  $v_{ik}$ , which leads to two levels of age association  
 216 between covariate and BrainAGE. (c) Proportional grey matter volume (volumetric data) generated  
 217 from non-linear combinations of ABFs. (d) Predicted-age and BrainAGE computed from simulated  
 218 volumetric data and simulated chronological age with Support Vector-based regression; (e) Test for  
 219 association between BrainAGE and covariates of interest.  
 220

221 A realistic simulation model should capture the properties of normal age-related brain volumetric  
 222 data, such as brain region-dependent changes and nonlinear chronological age dependence (Fjell et  
 223 al., 2013). A realistic simulation should also include the ability to generate age-dependent deviations  
 224 from the normal population and age-dependent covariates that may influence BrainAGE nonlinearly.  
 225 We consider a biological causal path model and develop a novel age-basis-function approach for  
 226 simulating BrainAGE data with covariates (Fig. 1, Fig. S2).

227 Denoting age by  $A$ , we assumed an underlying (unobserved) biological process represented by  $m$   
 228 functions of age, denoted as  $f_m(A)$ , which we referred to as age basis functions (ABFs). Here,  
 229 without a function space defined, the term “basis” is used loosely to indicate the elementary functions  
 230 that can be combined linearly to form any variable of interest  $y$ :  
 231

$$232 \quad y = \sum_{m=1} \mathbf{w}_m f_m(A) + \epsilon. \quad (1)$$

233 In this study, we implemented three monotone decreasing ABFs that can generate a wide range of  
 234 non-linear functions (Fig. S3), and used these ABFs to simulate covariates of interest and the features  
 235 extracted from an imaging modality.

236 *Simulating covariates.* A covariate of interest  $Z_j$  for participant  $i$  with chronological age  $A_i$  was  
 237 generated by

$$238 \quad Z_{ij} = \sum_{m=1}^3 \alpha_{mj} f_m(A_i) + \epsilon_{z_j} \quad (2)$$

239 where  $\alpha_{mj}$  is a covariate-specific weight and the covariate-specific error  $\epsilon_{z_j} \sim N(0, \sigma_j^2)$  denotes a  
 240 Gaussian noise with mean 0 and standard deviation  $\sigma_j$ .

241 *Simulating imaging modality.*

242 The proportional grey-matter volume for voxel  $k$  of a participant  $i$  with chronological age  $A_i$  was  
 243 generated by

$$244 \quad v_{ik} = \sum_{m=1}^3 w_{mik} f_m(A_i) + \epsilon_i \quad (3)$$

245 or, in short,  $v_{ik} = f(A_i) + \epsilon_i$ , where  $\epsilon_i$  represents Gaussian noise with mean 0 and standard  
 246 deviation  $\sigma_v$ . This setting allows capturing within-participant correlations (4b) and spatial  
 247 dependence within participants (4c):

$$248 \quad \text{Var}(v_{ik}) = \text{Var}(f(A_i)) + \sigma_v^2 \quad (4a)$$

$$249 \quad \text{Cov}(v_{ik}, v_{i'k}) = \text{Cov}(f(A_i), f(A_{i'})) + \sigma_v^2 \quad (4b)$$

$$250 \quad \text{Cov}(v_{ik}, v_{ik'}) = \text{Var}(f(A_i)) \quad (4c)$$

251 Note that the weight function  $w_{mik}(A_i)$  allows the weights of ABFs to vary across individuals and  
 252 volumes, and as a function of an individual's chronological age.

253 To further make the imaging modality dependent on some covariates, we let

$$254 \quad w_{mik} = w_{mk} + D_i \quad (5)$$

255 where  $w_{mk}$  is the population mean weight for ABF  $f_m$  at voxel  $k$ , and the participant level departures  
 256  $D_i$  depends on the first  $q$  variables (covariates):

$$257 \quad D_i = \gamma \sum_{j=1}^q Z_{ij}(A_i) \quad (6)$$

258 Other measurable variables,  $Z_{j>q}$ , do not contribute to the weights deviation. In addition to the age-  
 259 related imaging features that are generated from the ABFs, we also added 25% “background”  
 260 features that do not correlate with age. Other parameters such as standard deviation of the noise  $\epsilon$   
 261 were chosen with the objective of yielding  $R^2$  and MAE values that closely match our empirical  
 262 results when the volumetric features were used as inputs to the support vector regression (SVR)  
 263 model to estimate chronological age. Nevertheless, the choice of parameters and even the simulation  
 264 design matrix do not affect the overall improvement in the regression that includes age as an  
 265 explanatory variable from the regression without age.

266 Finally, we carried out linear regressions of the covariates of interest on BrainAGE, with and without  
 267 including age as an explanatory variable in the model. Over 100 replications, we assessed the  
 268 detectability of the covariates as significant contributors to BrainAGE by examining their p-value  
 269 distributions. In the ideal case, we should detect relationships between BrainAGE and covariates  
 270  $Z_j$ 's.

### 271 **2.3.2 Simulation steps**

- 272 1. Draw 1,000 age values from the uniform distribution  $U(20, 80)$ .
- 273 2. For each  $m = 1, 2, 3$ , draw 100  $w_{mik}$  values from  $N(0, \sigma_w)$  for each region  $k$ .

- 274 3. Set  $\alpha_{mj} = 0$  for some  $m$  and  $j$  (Table S1). Randomly draw the remaining  $\alpha_{mj}$  from the  
275 uniform distribution  $U(-2, -1)$  to construct the  $j$  covariate for each participant  $i$  (Eq. 4).
- 276 4. Construct the volumetric data set. For each imaging feature  $k$  of participant  $i$  (Eq. 2), add  
277 noisy volumetric features that do not correlate with age.
- 278 5. Randomly apply 50% of the (age, volumetric) data for training and 50% for validation. Train  
279 the SVR model using the R package `e1071` with hyperparameters set as default on the  
280 training set and apply the model on the validation set to compute the BrainAGE scores.
- 281 6. On the testing set, run linear regressions of BrainAGE on all covariates, with and without age.
- 282 7. Assess the significance of the covariates by looking at the confidence intervals of their  
283 coefficients as well as the distribution of the resulting p-values.

284 In steps 3 and 4, we simulated 16 covariate types in each of 1000 replicate data sets (Table S1). The  
285 16 variables were simulated by using all 8 possible combinations of the three age basis functions.  
286 Half of them contributed to the weights  $w_{mik}(A)$ , which consequently affected the grey matter  
287 density. For example,  $Z_2$  and  $Z_{10}$  were both derived from only the linear basis function  $f_1$ , but  $Z_{10}$   
288 does not influence the aging.

289 Additionally, the complete simulation procedure was carried out for two scenarios: one with  
290 relatively large and another with relatively small effects of the covariates on BrainAGE. This was  
291 achieved by modifying the constant  $\gamma$  in Eq. (3) so that, in one case, the final weights  $w_{mik}$  have a  
292 larger fold change on the original weights. In particular, the fold change is computed as

$$293 \quad FC = \frac{\bar{w}_{mik}}{w_{mk}} = \frac{w_{mk} + \bar{D}_{mik}}{w_{mk}},$$

294 where  $\bar{D}_{mik}$  is the average of  $D_{mik}(A)$  across all ages.

## 295 3 Results

### 296 3.1 Empirical

#### 297 3.1.1 Covariate Correlations with Age

298 Observed Pearson correlations between age and the 154 clinical variables ranged from -0.33  
299 (PROMIS physical function) to 0.29 (waist circumference) (Fig. S4). Because any confounding  
300 effect of the correlation between age and covariates of interest is likely to be worse with larger  
301 correlations, we focused on simulated covariates that correlated with age with an  $r$  of up to 0.3.

#### 302 3.1.2 Age Prediction Accuracy and Bias

303 After fitting on the training dataset, SVR achieved a mean absolute error of 4.84 years and explained  
304 64% of the variance in age in the testing dataset (Fig. 2a). This is comparable to the cross-validated  
305 performance on the training set, where MAE was 5.1 years and  $R^2$  was 0.59. The correlation between  
306 age and predicted age was 0.82. On the other hand, regression towards the mean lead to a negative  
307 relationship between age and BrainAGE ( $r = -0.63$ , Fig. 2c). After removing the linear trend as  
308 shown in Figure 2c, we observed no relationship between age and BrainAGER ( $r = 0.001$ , Fig. 2e).  
309 More explicitly, BrainAGE had a positive expected value at low chronological age and a negative  
310 expected value at high chronological age, while BrainAGER has an expected value of 0 regardless of  
311 actual age.



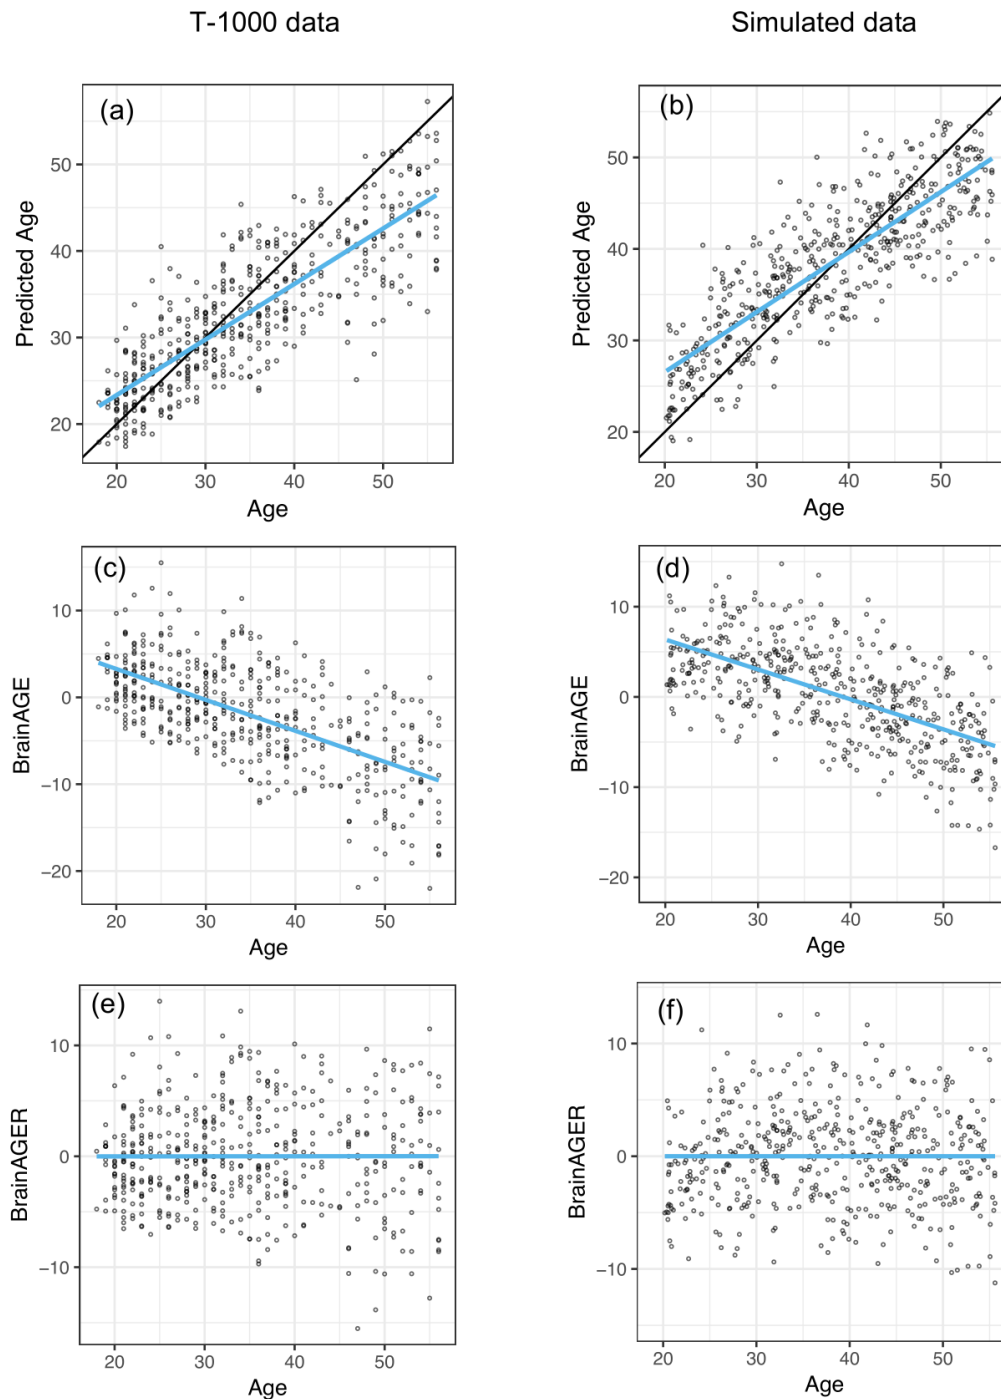

312  
 313 Figure 2. Similar out-of-sample  $R^2$  when applying SVR to predict age as well as negative correlation  
 314 between BrainAGE and chronological age between T1000 data and simulated data. (a-b)  
 315 Chronological age versus predicted age in the testing dataset, with a mean absolute error (MAE) of  
 316 4.78 years and  $R^2 = 0.65$  in (a) and MAE = 5.15,  $R^2 = 0.841$  in (b). Overlaying **black** 45-degree line  
 317 and **blue** regression line showed regression toward the mean. (c-d) Chronological age versus  
 318 BrainAGE ( $r = -0.63$ ). Negative correlation between BrainAGE and chronological age indicates  
 319 younger participants tend to have positive BrainAGE and old participants tend to have negative  
 320 BrainAGE. (e-f) After removing the linear trend in b-c, there is no relationship between age and  
 321 BrainAGER ( $r = 0.001$ ). BrainAGER has an expected value of 0, regardless of chronological age.

### 3.1.3 Relationships among age-covariate, covariate-BrainAGE, and covariate-BrainAGER correlations

In order to investigate the effect that the correlation between BrainAGE and chronological age can have on the conclusions of an imaging study, we computed the correlations between each of the covariates and age, BrainAGE and BrainAGER. Larger age-covariate correlations lead to larger differences in measured correlation between that covariate and BrainAGER or BrainAGE (Fig. 3a, colored points far from the 45° line). When age did not correlate with a covariate, BrainAGE and BrainAGER tended to give similar results (grey points, near the 45° line). When age positively correlated with covariates (e.g., BMI), BrainAGER gave more positive values, and when age negatively correlated with covariates (e.g., PROMIS physical function), BrainAGER yields more negative values. Similarly, the greater the variance explained by age, the greater the squared difference in  $r$  between using BrainAGE or BrainAGER (3b).

Table 1 shows the top 22 variables that are significantly correlated with either BrainAGE or BrainAGER after FDR correction for 154 tests. Notably, 18 variables were related to BrainAGE, and the strongest relationships were among variables strongly correlated with age, including body composition (percent body fat  $r = -0.2$ , percent body water  $r = 0.2$ , percent dry lean mass  $r = 0.2$ ) and sensation seeking ( $r = 0.18$ ). BrainAGER was only significantly correlated with six variables including waist to hip ratio ( $r = 0.15$ ), color naming scaled ( $r = -0.15$ ), and lean body mass ( $r = 0.17$ ).

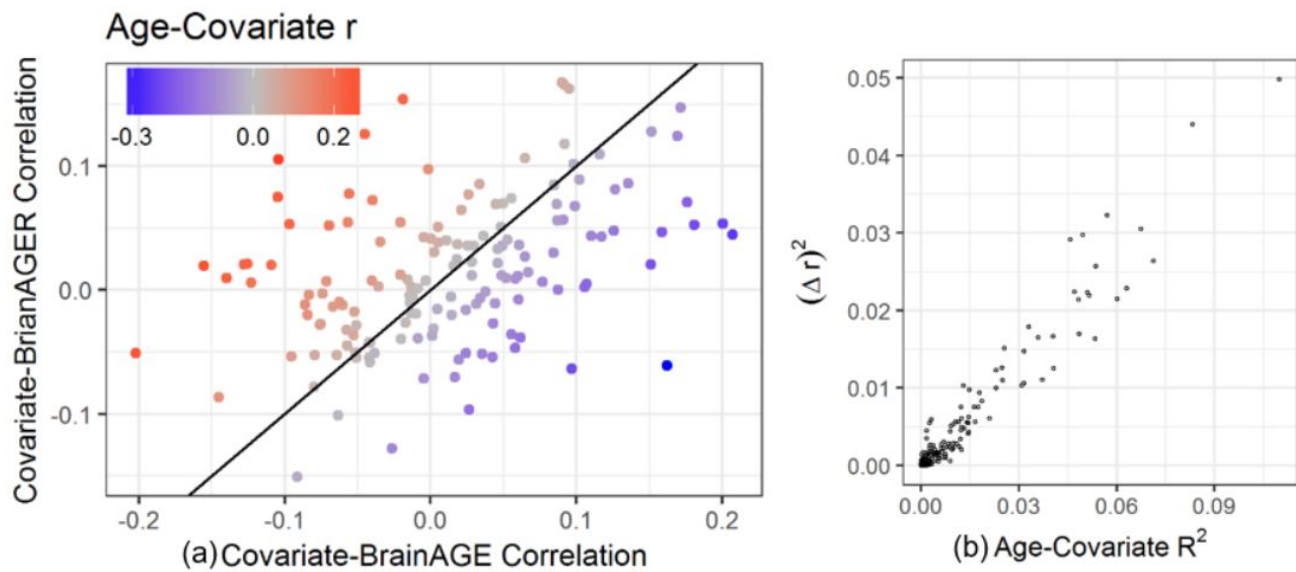

Figure 3. Relationship between age-covariate correlation and the difference in measured correlation. The difference between using BrainAGE and BrainAGER depends on the age-covariate relationship. (a) Covariate-BrainAGER correlations as a function of the covariate-BrainAGE correlation, with points colored according to the Age-Covariate correlation. The 45-degree line is shown, and covariates more strongly related to age are further from the line. (b) The squared difference in  $r$  between using BrainAGE and BrainAGER as a function of the variance explained by age.

## 3.2 Simulation

### 3.2.1 Negative correlation between BrainAGE and chronological age in simulated MRI data

We set the parameters of our simulation algorithm to achieve realistic characteristics of experimental data, such as correlation distribution between volumes and chronological age and the negative correlation between computed BrainAGE and chronological age. This negative correlation was also

352 present in previous models such as with Gaussian Process Regression (Cole et al., 2017) and  
 353 Relevant Vector Regression (Franke et al., 2010). Simulated results closely mirrored empirical  
 354 results. The simulated testing data had MAE of 4.58 years and  $R^2$  of 0.71 (2b). In our simulated data,  
 355 we observed an overestimation of younger participant's ages and an underestimation of older  
 356 participant's ages (Fig. 2d). After removing the effect of age on BrainAGE, simulated BrainAGER  
 357 had an expected value of 0 regardless of actual age (2f).

|                                         | $r_{BrainAGE}$ | $p_{BrainAGE}$   | $r_{BrainAGER}$ | $p_{BrainAGER}$ | $r_{age}$ |
|-----------------------------------------|----------------|------------------|-----------------|-----------------|-----------|
| <i>PROMIS_PainInterfTscore</i>          | -0.128         | <b>0.047</b>     | 0.021           | 0.91            | 0.227     |
| <i>PhysFunc</i>                         | 0.162          | <b>0.006</b>     | -0.061          | 0.655           | -0.331    |
| <i>BAS_FunSeeking</i>                   | 0.159          | <b>0.007</b>     | 0.047           | 0.7             | -0.201    |
| <i>TES_TotalOccurrence</i>              | -0.14          | <b>0.025</b>     | 0.01            | 0.971           | 0.226     |
| <i>IRI_EmpaConcern</i>                  | -0.145         | <b>0.019</b>     | -0.086          | 0.416           | 0.11      |
| <i>IntSexAct</i>                        | 0.151          | <b>0.011</b>     | 0.021           | 0.91            | -0.22     |
| <i>UPPSP_SensSeek</i>                   | 0.181          | <b>0.002</b>     | 0.053           | 0.655           | -0.231    |
| <i>CDDR_PosReinforcement</i>            | 0.151          | <b>0.047</b>     | 0.128           | 0.238           | -0.073    |
| <i>PROMIS_AlcoholNegConsqTscore</i>     | 0.172          | <b>0.004</b>     | 0.147           | <b>0.03</b>     | -0.095    |
| <i>PROMIS_AlcoholPosConsqTscore</i>     | 0.176          | <b>0.003</b>     | 0.071           | 0.545           | -0.193    |
| <i>PROMIS_AlcoholPosExpectTscore</i>    | 0.127          | <b>0.047</b>     | 0.081           | 0.455           | -0.098    |
| <i>PROMIS_AlcoUseTscore</i>             | 0.169          | <b>0.004</b>     | 0.124           | 0.108           | -0.112    |
| <i>DryLeanMass</i>                      | 0.095          | 0.17             | 0.162           | <b>0.017</b>    | 0.042     |
| <i>FatMass</i>                          | -0.155         | <b>0.009</b>     | 0.02            | 0.91            | 0.26      |
| <i>LeanBodyMass</i>                     | 0.091          | 0.183            | 0.166           | <b>0.017</b>    | 0.052     |
| <i>PercentBodyFat</i>                   | -0.202         | <b>&lt;0.001</b> | -0.051          | 0.655           | 0.251     |
| <i>Water</i>                            | 0.09           | 0.191            | 0.167           | <b>0.017</b>    | 0.056     |
| <i>W.HRatio</i>                         | -0.019         | 0.834            | 0.154           | <b>0.03</b>     | 0.223     |
| <i>PercentWater</i>                     | 0.2            | <b>&lt;0.001</b> | 0.054           | 0.655           | -0.245    |
| <i>PercentDryLean</i>                   | 0.207          | <b>&lt;0.001</b> | 0.044           | 0.727           | -0.267    |
| <i>CW_ColorNamingScaled</i>             | -0.092         | 0.196            | -0.151          | <b>0.03</b>     | -0.041    |
| <i>CW_InhibitionVsColorNamingScaled</i> | 0.135          | <b>0.04</b>      | 0.086           | 0.416           | -0.108    |

358 Table 1. Correlation and significance after FDR adjustment of each covariate with BrainAGE  
 359 ( $r_{BrainAGE}$ ,  $p_{BrainAGE}$ ) or BrainAGER ( $r_{BrainAGER}$ ,  $p_{BrainAGER}$ ). The last column contains the direct  
 360 correlation between each covariate and age ( $r_{age}$ ). For brainAGE, where age is not adjusted, there are  
 361 17 covariates with FDR adjusted p-values  $<.05$  and for BrainAGER, which residualizes age, there are  
 362 six covariates with adjusted p-value  $<.05$ . Cells with p less than 0.05 are bold.  
 363

### 364 3.2.2 Reduction of false discoveries in regression that include age as explanatory variable

365 In the linear models regressing BrainAGE on the 16 covariates of interest with simulated large effect  
 366 sizes (FC = 1.255), we observed the following: when age was not included as an explanatory  
 367 variable, many age-related covariates were shown to have statistically significant association with  
 368 BrainAGE (Fig. 4a, c), even when they did not contribute to the weights that made up the  
 369 neuroimaging features (Fig. 4, orange boxplots above the horizontal). These false positives (FP)  
 370 were simply the result of the relationship between these covariates and chronological age that are part  
 371 of the BrainAGE's defining formula. Moreover, several covariates that were simulated to contribute  
 372 to the brain structure volumes had p-values on average above 0.05 (Fig 4, blue boxplots below the  
 373 horizontal).

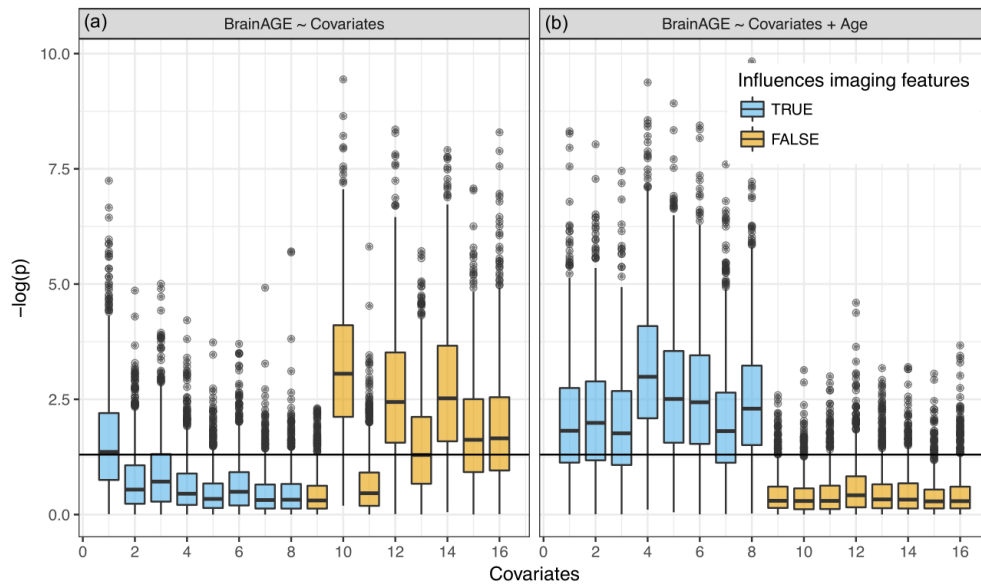

(a-b) Fold change = 1.255

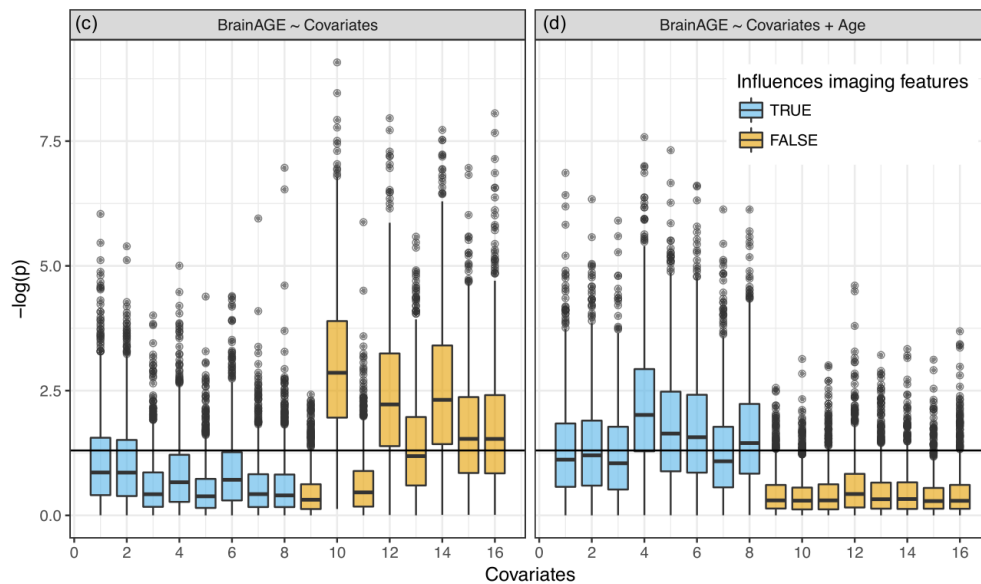

(c-d) Fold change = 1.170

374  
 375 Figure 4. Significance of linear regression of covariates with BrainAGE for 100 replicate  
 376 simulations. Each data set contains 16 age-dependent covariates with differing age dependencies  
 377 (linear and nonlinear) and effects on volumetric variation. **Blue** boxes are variables that have a direct  
 378 (TRUE) effect on BrainAGE, **orange** boxes are variables that do not have a direct effect on  
 379 BrainAGE (FALSE), and this effect is relatively large in the top (a, b) and small in the bottom (c, d)  
 380 plots. Boxplots on the left (a, c) do not use age as an explanatory variable and models on the right (b,  
 381 d) include age as an explanatory variable. "Significance" was measured by  $-\log(p)$ . Horizontal line is  
 382 at  $-\log(0.05)$ .

383 When age was included in the regression as an extra explanatory variable, the significance increased  
384 (p-values decreased) for all variables that were generated to have an association with the imaging  
385 features, even variables that were already detected in the previous regression without age (Fig. 4b, d).  
386 Further, the decrease in significance (increase in p-values) for unrelated covariates indicated a  
387 significant decrease in the number of false positives. Variation in the p-values across covariates came  
388 from their different (linear and nonlinear) age dependencies and effects on volumetric variation. In  
389 other words, the real “significance” of a covariate depended on from which age basis functions it was  
390 generated and how it affected the brain features ( $w_{1k}$ ,  $w_{2k}$  or  $w_{3k}$ ). Simulations with a smaller effect  
391 size (FC = 1.170, Fig 4c, d) showed a similar effect, though attenuated, for covariates that were  
392 contributors to  $w_{mk}$ . The positive rate (true and false) across 100 replications is quantified in  
393 Supplementary Table S2. Values in this table represent the portion of each boxplot above the  
394 horizontal line, which is the TP rate for covariates that had an influence on imaging features and FP  
395 rates for covariates that did not.

#### 396 4 Discussion

397 This study aims to highlight the relationship between chronological age and BrainAGE and its  
398 transitive effect on the relationship between BrainAGE and covariates of interest that are also related  
399 to age. We propose a solution to this problem: either use BrainAGER, or in the simple case of post-  
400 hoc linear regression, use chronological age as a covariate in subsequent analyses. We developed a  
401 simulation framework to generate data with complex, but known, relationships between the original  
402 imaging features, age, and a set of covariates that may also be related to age. Then, we were able to  
403 quantify the effect that accounting for age has on the ability to detect actual and spurious correlations  
404 with covariates in subsequent analyses.

405 Our main findings can be separated into three parts: analytical, empirical, and simulated data results.  
406 The analytical results provide a theoretical basis for the age-BrainAGE correlation, and the analyses  
407 using real and simulated data demonstrate this effect in practice. For the empirical data, there were  
408 three main findings: 1) many variables that may be of interest are correlated with age with Pearson  
409 coefficients of up to  $r = 0.3$ , 2) BrainAGE is strongly negatively correlated with chronological age ( $r$   
410  $= -0.63$  in our dataset), 3) BrainAGER provides a measure of deviation between predicted and actual  
411 age that is not dependent on age, and has substantially different correlations with covariates that are  
412 correlated with age when compared to BrainAGE.

413 Since it is unknown which covariates are actually related to premature aging, we then developed a  
414 simulation framework to generate synthetic data. Simulated data showed: 1) similar characteristics to  
415 actual data when used to train and test a model on separate datasets, and 2) increased detectability of  
416 true positives and decreased occurrence of false positives when accounting for the age-covariate  
417 relationship, with this being modulated by the size of the simulated effect on physiology.

418 Based on our observations in both real and simulated data, we recommend that the relationship  
419 between chronological age and BrainAGE should be accounted for. The two methods proposed in  
420 this study are either: 1) regress age on BrainAGE, producing BrainAGER, which is centered on 0  
421 regardless of a participant’s actual age or 2) include age as a regressor when doing follow-up  
422 analyses. In fact, these two methods will produce the same coefficients in the case of linear  
423 regression, with slightly larger t-statistics in the second case. The advantage of using BrainAGER is  
424 simplicity and generalizability; it could be used as the dependent variable in any arbitrary model,  
425 rather than being confined to simple linear regression. While the focus of this study is not to show  
426 specific correlates of premature aging, it is worth noting that 17 variables significantly correlated to  
427 BrainAGE whereas only 6 were related to BrainAGER, with 1 variable (PROMIS Alcohol Negative  
428 Consequences) overlapping between the two sets (Table 1). Thus, accounting for the age-BrainAGE  
429 relationship results in a vastly different set of positive findings and would lead to a remarkably



430 different interpretation of these data. More explicitly, not correcting the age-BrainAGE correlation  
431 would lead to an extensive set of spurious results in this dataset.

### 432 *Limitations*

433 There are a few cases where the age-BrainAGE correlation is not relevant. When comparing two  
434 groups with matched age, any differences in BrainAGE are not likely to be caused by the relationship  
435 with age. When the individuals being examined are in a restricted age range, there is not likely to be  
436 much contribution from the age-BrainAGE correlation. Also, when the variable of interest is not  
437 related to age, removing the effect of age makes almost no difference (Fig 3b). However, when these  
438 cases are not true, our findings suggest that we should include age as an explanatory variable in a  
439 final model that aims to detect association of brain anomalies with covariates of interest.

440 The magnitude of the age-BrainAGE correlation is directly related to the accuracy of the prediction  
441 model. The fact that the residuals are correlated with observed values is a characteristic of regression  
442 in general, regardless of the specific data domain, and has a theoretical basis described in section 2.1.  
443 Several factors may decrease the model performance on our testing set, and thereby increase the age-  
444 BrainAGE correlation. Specifically, the distribution of age ranges in our samples is non-uniform,  
445 which may lead to more weight being given to the middle of the distribution. There are substantial  
446 differences between the testing and training sets we used including age, sex, and diagnosis. It may  
447 therefore be possible to improve model performance on the testing set by subsampling the training  
448 set to have a more uniform distribution of ages and to match the testing set on several factors.  
449 However, model performance is already comparable across testing and training sets ( $R^2$  of 0.59 and  
450 MAE of 5.1 years, compared to 0.64 and 4.84) and is comparable with what has been previously  
451 reported.

452 Although the simulation was carefully designed and executed, because of the model's complexity,  
453 we have not fully explored all scenarios with different simulation parameters. However, we have  
454 identified effect size as the most important parameter and showed how it influenced the results.  
455 When varying other parameters, we still observed a reduction in the number of false positives when  
456 age is included as an explanatory variable in the final regression (results not shown). Moreover,  
457 while determining the parameters, we aimed to obtain realistic patterns as we observed in real data,  
458 such as similar distributions of the correlation values.

459 By constructing and studying an appropriate generative model containing covariates that have linear  
460 and non-linear relationship with age, we demonstrated that the correlation between covariates and  
461 age should be considered when making inferences about the relationship between BrainAGE and  
462 these covariates.

## 463 **5 Conflict of Interest**

464 The authors declare that the research was conducted in the absence of any commercial or financial  
465 relationships that could be construed as a potential conflict of interest.

## 466 **6 Author Contributions**

467 TL, RK, BM, HY, WT and MP contributed to the design of the study. TL and RK wrote the  
468 manuscript. TL performed simulation analyses and RK performed empirical analyses. All authors  
469 revised the manuscript critically for important intellectual content and approved the final manuscript.

## 470 **7 Funding**

471 This work has been supported in part by The William K. Warren Foundation, the National Institute of  
472 Mental Health Award Numbers K23MH112949 (SSK), K23MH108707 (RLA), K01MH096175-01

473 (WKS) and the National Institute of General Medical Sciences Center Grant Award Number  
474 1P20GM121312. The content is solely the responsibility of the authors and does not necessarily  
475 represent the official views of the National Institutes of Health.

## 476 **8 Acknowledgments**

## 477 **9 References**

- 478 Cole, J. H., and Franke, K. (2017). Predicting Age Using Neuroimaging: Innovative Brain Ageing  
479 Biomarkers. *Trends Neurosci.* 40, 681–690. doi:10.1016/j.tins.2017.10.001.
- 480 Cole, J. H., Leech, R., Sharp, D. J., and Alzheimer’s Disease Neuroimaging Initiative (2015).  
481 Prediction of brain age suggests accelerated atrophy after traumatic brain injury. *Ann. Neurol.*  
482 77, 571–581. doi:10.1002/ana.24367.
- 483 Cole, J. H., Ritchie, S. J., Bastin, M. E., Hernández, M. C. V., Maniega, S. M., Royle, N., et al.  
484 (2018). Brain age predicts mortality. *Mol. Psychiatry* 23, 1385–1392.  
485 doi:10.1038/mp.2017.62.
- 486 Dale, A. M., Fischl, B., and Sereno, M. I. (1999). Cortical Surface-Based Analysis: I. Segmentation  
487 and Surface Reconstruction. *NeuroImage* 9, 179–194. doi:10.1006/nimg.1998.0395.
- 488 Drucker, H., Burges, C. J. C., Kaufman, L., Smola, A. J., and Vapnik, V. (1997). Support Vector  
489 Regression Machines. 7.
- 490 Elwood, J. M. (1992). *Causal Relationships in Medicine: A Practical System for Critical Appraisal.*  
491 Oxford University Press.
- 492 Erus, G., Battapady, H., Satterthwaite, T. D., Hakonarson, H., Gur, R. E., Davatzikos, C., et al.  
493 (2015). Imaging Patterns of Brain Development and their Relationship to Cognition. *Cereb.*  
494 *Cortex* 25, 1676–1684. doi:10.1093/cercor/bht425.
- 495 First, M. B., Spitzer, R. L., Miriam, G., and Williams, J. B. W. (2002). Structured Clinical Interview  
496 for DSM-IV-TR Axis I Disorders, Research Version, Non-patient Edition. (SCID-I/NP).
- 497 Fjell, A. M., Westlye, L. T., Grydeland, H., Amlie, I., Espeseth, T., Reinvang, I., et al. (2013).  
498 Critical ages in the life course of the adult brain: nonlinear subcortical aging. *Neurobiol.*  
499 *Aging* 34, 2239–2247. doi:10.1016/j.neurobiolaging.2013.04.006.
- 500 Franke, K., Gaser, C., Manor, B., and Novak, V. (2013). Advanced BrainAGE in older adults with  
501 type 2 diabetes mellitus. *Front. Aging Neurosci.* 5. doi:10.3389/fnagi.2013.00090.
- 502 Franke, K., Ziegler, G., Klöppel, S., and Gaser, C. (2010). Estimating the age of healthy subjects  
503 from T1-weighted MRI scans using kernel methods: Exploring the influence of various  
504 parameters. *NeuroImage* 50, 883–892. doi:10.1016/j.neuroimage.2010.01.005.
- 505 Galton, F. (1886). Regression Towards Mediocrity in Hereditary Stature. *J. Anthropol. Inst. G. B.*  
506 *Irel.* 15, 246. doi:10.2307/2841583.
- 507 Gaser, C., Franke, K., Klöppel, S., Koutsouleris, N., Sauer, H., and Initiative, A. D. N. (2013).  
508 BrainAGE in Mild Cognitive Impaired Patients: Predicting the Conversion to Alzheimer’s  
509 Disease. *PLOS ONE* 8, e67346. doi:10.1371/journal.pone.0067346.
- 510 Gutierrez Becker, B., Klein, T., and Wachinger, C. (2018). Gaussian process uncertainty in age  
511 estimation as a measure of brain abnormality. *NeuroImage* 175, 246–258.  
512 doi:10.1016/j.neuroimage.2018.03.075.

- 513 Habes, M., Janowitz, D., Erus, G., Toledo, J. B., Resnick, S. M., Doshi, J., et al. (2016). Advanced  
514 brain aging: relationship with epidemiologic and genetic risk factors, and overlap with  
515 Alzheimer disease atrophy patterns. *Transl. Psychiatry* 6, e775. doi:10.1038/tp.2016.39.
- 516 Han, C. E., Peraza, L. R., Taylor, J.-P., and Kaiser, M. (2014). Predicting age across human lifespan  
517 based on structural connectivity from diffusion tensor imaging. in (IEEE), 137–140.  
518 doi:10.1109/BioCAS.2014.6981664.
- 519 Koutsouleris, N., Davatzikos, C., Borgwardt, S., Gaser, C., Bottlender, R., Frodl, T., et al. (2014).  
520 Accelerated Brain Aging in Schizophrenia and Beyond: A Neuroanatomical Marker of  
521 Psychiatric Disorders. *Schizophr. Bull.* 40, 1140–1153. doi:10.1093/schbul/sbt142.
- 522 Le, T. T., Kuplicki, R., Yeh, H.-W., Aupperle, R. L., Khalsa, S. S., Simmons, W. K., et al. (2018).  
523 Effect of Ibuprofen on BrainAGE: A Randomized, Placebo-Controlled, Dose-Response  
524 Exploratory Study. *Biol. Psychiatry Cogn. Neurosci. Neuroimaging* 0.  
525 doi:10.1016/j.bpsc.2018.05.002.
- 526 Liem, F., Varoquaux, G., Kynast, J., Beyer, F., Kharabian Masouleh, S., Huntenburg, J. M., et al.  
527 (2017). Predicting brain-age from multimodal imaging data captures cognitive impairment.  
528 *NeuroImage* 148, 179–188. doi:10.1016/j.neuroimage.2016.11.005.
- 529 Lin, L., Jin, C., Fu, Z., Zhang, B., Bin, G., and Wu, S. (2016). Predicting healthy older adult’s brain  
530 age based on structural connectivity networks using artificial neural networks. *Comput.  
531 Methods Programs Biomed.* 125, 8–17. doi:10.1016/j.cmpb.2015.11.012.
- 532 Löwe, L. C., Gaser, C., Franke, K., and Initiative, for the A. D. N. (2016). The Effect of the APOE  
533 Genotype on Individual BrainAGE in Normal Aging, Mild Cognitive Impairment, and  
534 Alzheimer’s Disease. *PLOS ONE* 11, e0157514. doi:10.1371/journal.pone.0157514.
- 535 Nenadić, I., Dietzek, M., Langbein, K., Sauer, H., and Gaser, C. (2017). BrainAGE score indicates  
536 accelerated brain aging in schizophrenia, but not bipolar disorder. *Psychiatry Res.  
537 Neuroimaging* 266, 86–89. doi:10.1016/j.psychresns.2017.05.006.
- 538 Pourhoseingholi, M. A., Baghestani, A. R., and Vahedi, M. (2012). How to control confounding  
539 effects by statistical analysis. *Gastroenterol. Hepatol. Bed Bench* 5, 79–83.
- 540 Ritchie, S. J., Tucker-Drob, E. M., Cox, S. R., Dickie, D. A., Hernández, M. del C. V., Corley, J., et  
541 al. (2017). Risk and protective factors for structural brain ageing in the eighth decade of life.  
542 *Brain Struct. Funct.* 222, 3477–3490. doi:10.1007/s00429-017-1414-2.
- 543 Shammass, M. A. (2011). Telomeres, lifestyle, cancer, and aging. *Curr. Opin. Clin. Nutr. Metab. Care*  
544 14, 28–34. doi:10.1097/MCO.0b013e32834121b1.
- 545 Sheehan, D. V., Lecrubier, Y., Sheehan, K. H., Amorim, P., Janavs, J., Weiller, E., et al. (1998). The  
546 Mini-International Neuropsychiatric Interview (M.I.N.I.): The Development and Validation  
547 of a Structured Diagnostic Psychiatric Interview for DSM-IV and ICD-10. *J. Clin. Psychiatry*  
548 59, 22–33.
- 549 Steffener, J., Habeck, C., O’Shea, D., Razlighi, Q., Bherer, L., and Stern, Y. (2016). Differences  
550 between chronological and brain age are related to education and self-reported physical  
551 activity. *Neurobiol. Aging* 40, 138–144. doi:10.1016/j.neurobiolaging.2016.01.014.
- 552 Tian, L., Ma, L., and Wang, L. (2016). Alterations of functional connectivities from early to middle  
553 adulthood: Clues from multivariate pattern analysis of resting-state fMRI data. *NeuroImage*  
554 129, 389–400. doi:10.1016/j.neuroimage.2016.01.039.

- 555 Victor, T. A., Khalsa, S. S., Simmons, W. K., Feinstein, J. S., Savitz, J., Aupperle, R. L., et al.  
556 (2018). Tulsa 1000: a naturalistic study protocol for multilevel assessment and outcome  
557 prediction in a large psychiatric sample. *BMJ Open* 8, e016620. doi:10.1136/bmjopen-2017-  
558 016620.
- 559 Wilkins, L. W. & (2017). Increased brain-predicted aging in treated HIV disease. *Neurology* 89,  
560 1652–1652. doi:10.1212/WNL.0000000000004408.  
561
